# Supplementary material for: High-efficiency solid-state polymer electrolyte dye-sensitized solar cells with a bi-functional porous layer
Source: Royal Society of Chemistry journal article supplement (doi:10.1039/c4ta04064c), 2014-01-01
Supplement: c4ta04064c1.pdf [file c4ta04064c1.pdf]

## **Supporting Information**

# **High-efficiency Solid-state Polymer Electrolyte Dye-sensitized Solar Cells with a Bi-functional Porous Layer**

**Woohyung Cho<sup>a</sup>, Young Rae Kim<sup>a</sup>, Donghoon Song<sup>a</sup>, Hyung Woo Choi<sup>a</sup> and Yong Soo Kang<sup>a,\*</sup>**

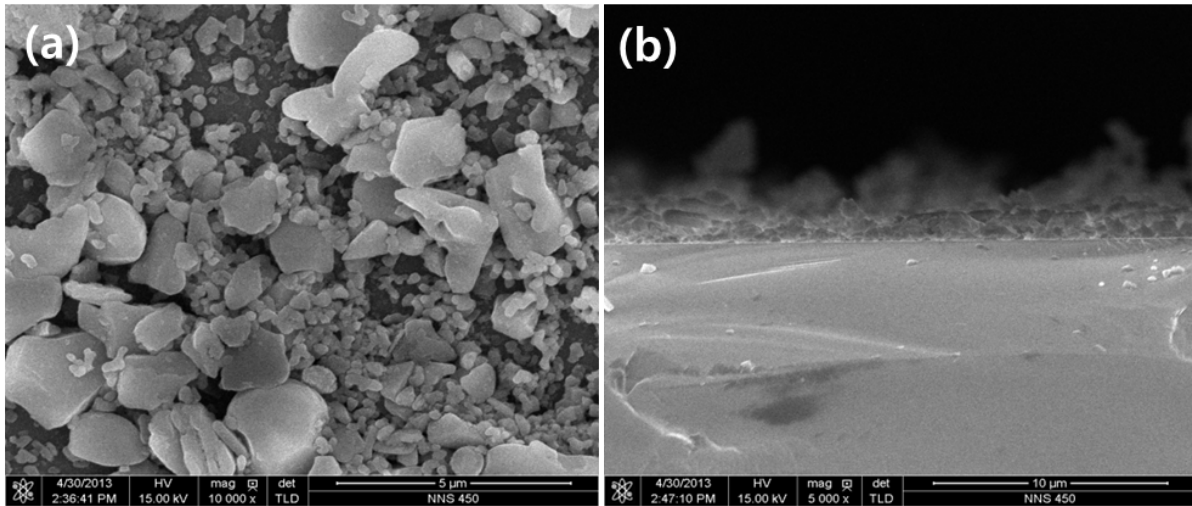

**Fig. S1.** SEM image of an alumina scattering layer (a) top-view and (b) cross-section.

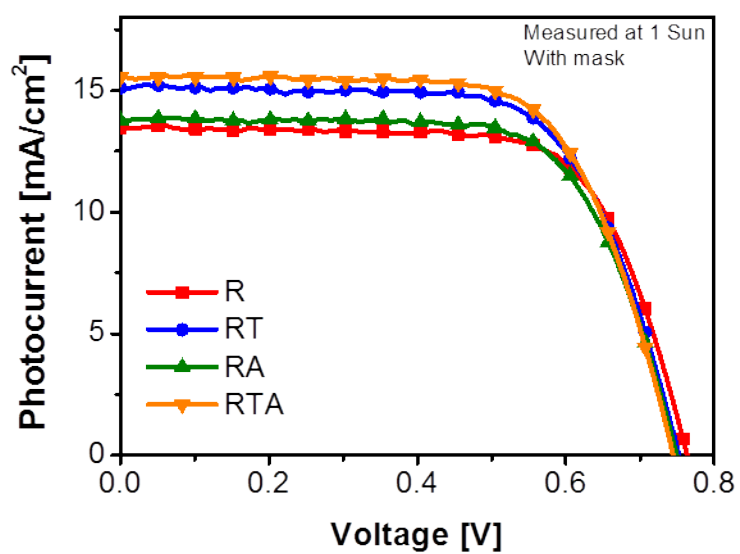

**Fig. S2.** IV characteristics from different electrodes of transparent TiO<sub>2</sub> and those with and without alumina and a TiO<sub>2</sub> scattering layer.

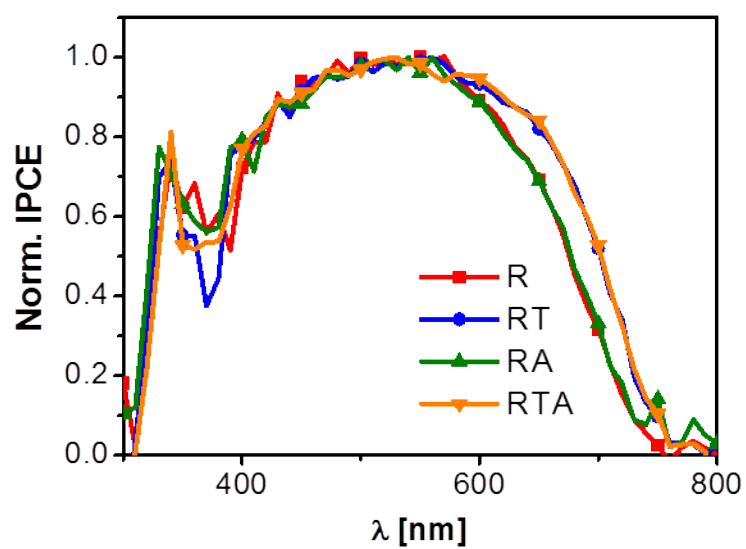

**Figure S3.** IPCE spectra of DSCs with a transparent reference  $\text{TiO}_2$  (**R**) without a scattering layer and with alumina (**A**) and titania (**T**) layers.

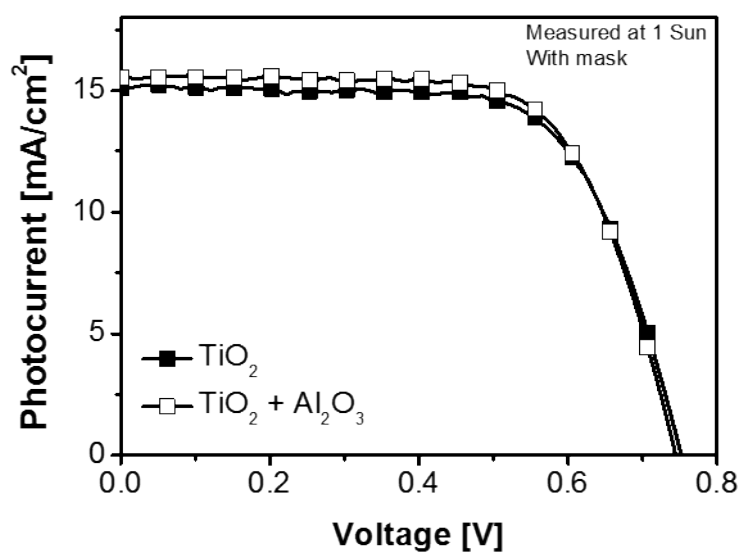

**Fig. S4.** IV characteristics from different electrodes of transparent TiO<sub>2</sub> and those with and without alumina based on liquid electrolyte.

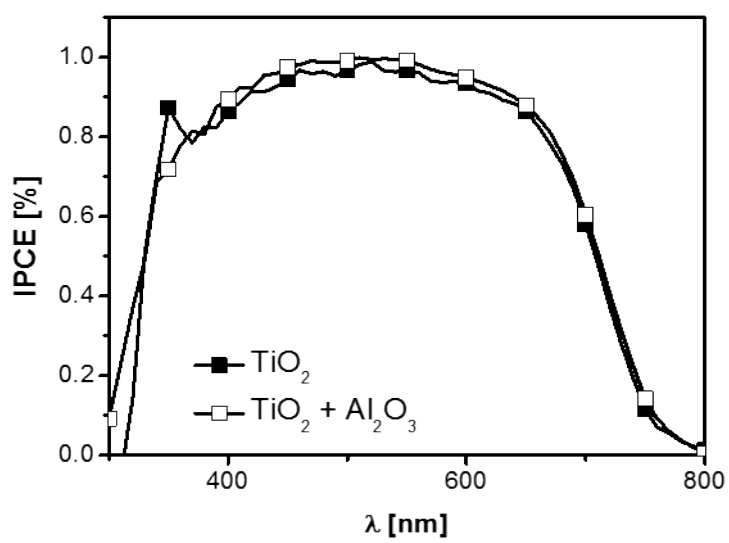

**Figure S5.** Normalized IPCE spectra of DSCs from different electrodes of transparent TiO<sub>2</sub> and those with and without alumina based on liquid electrolyte.

**Table S1.** Photovoltaic performance of DSCs based on liquid electrolyte and an SPE using an alumina layer with varying thickness of spacer.

| <b>Electrolyte</b> | <b>Symbol</b> | <b>Spacer/<math>\mu\text{m}</math></b> | <b><math>V_{oc}/V</math></b> | <b><math>J_{sc}/\text{mAcm}^{-2}</math></b> | <b>FF</b> | <b>Eff./%</b> |
|--------------------|---------------|----------------------------------------|------------------------------|---------------------------------------------|-----------|---------------|
| Liquid             | <b>L</b>      | 25                                     | 0.70                         | 17.5                                        | 0.73      | 9.0           |
|                    | <b>P0</b>     | 0                                      | 0.72                         | 16.5                                        | 0.69      | 8.2           |
| Polymer            | <b>P10</b>    | 25                                     | 0.73                         | 15.7                                        | 0.70      | 8.0           |
|                    | <b>P45</b>    | 60                                     | 0.74                         | 14.5                                        | 0.69      | 7.4           |

**Table S2.** Photovoltaic performance of DSCs based on different electrodes of transparent TiO<sub>2</sub> and those with and without alumina and a TiO<sub>2</sub> scattering layer.

| Electrode                                                             | V <sub>OC</sub> /V | J <sub>SC</sub> /mAcm <sup>-2</sup> | FF   | Eff./% |
|-----------------------------------------------------------------------|--------------------|-------------------------------------|------|--------|
| <b>R</b> (Ref)                                                        | 0.76               | 13.5                                | 0.70 | 7.2    |
| <b>RA</b> (Ref+Al <sub>2</sub> O <sub>3</sub> )                       | 0.75               | 13.8                                | 0.70 | 7.2    |
| <b>RT</b> (Ref+TiO <sub>2</sub> )                                     | 0.75               | 15.1                                | 0.68 | 7.7    |
| <b>RTA</b><br>(Ref+TiO <sub>2</sub> +Al <sub>2</sub> O <sub>3</sub> ) | 0.75               | 15.5                                | 0.68 | 7.9    |



**Table S3.** Photovoltaic performance of liquid electrolyte based-DSCs based on different electrodes of transparent TiO<sub>2</sub> and those with and without alumina.

| Electrode                                         | V <sub>OC</sub> /V | J <sub>SC</sub> /mAcm <sup>-2</sup> | FF   | Eff./% |
|---------------------------------------------------|--------------------|-------------------------------------|------|--------|
| TiO <sub>2</sub>                                  | 0.75               | 15.1                                | 0.68 | 7.7    |
| TiO <sub>2</sub> + Al <sub>2</sub> O <sub>3</sub> | 0.75               | 15.5                                | 0.68 | 7.9    |
